# Supplementary material for: High-performance Zn2SnO4anodes enabled by MOF-derived MnO decoration and carbon confinement for lithium-ion batteries
Source: Royal Society of Chemistry journal article supplement (doi:10.1039/d1ce00084e), 2021-01-01
Supplement: d1ce00084e1.pdf [file d1ce00084e1.pdf]

Electronic Supplementary Information for

## **High-performance Zn<sub>2</sub>SnO<sub>4</sub> anodes enabled by MOF-derived MnO decoration and carbon confinement for lithium-ion batteries**

*Hongyan Chen<sup>a</sup>, Jiajing Zhou<sup>a</sup>, Fuyuan Guo<sup>a</sup>, Yaqian Wang<sup>a</sup>, Yue Chen<sup>a</sup>, Yan Liang<sup>a</sup>, Yunlong Xu\*<sup>a</sup>, Huang Zhang\*<sup>b</sup>*

<sup>a</sup> School of Materials Science and Engineering, East China University of Science and Technology, Shanghai 200237, China. Email: [xuyunlong@ecust.edu.cn](mailto:xuyunlong@ecust.edu.cn)

<sup>b</sup> Institute of Flexible Electronics (IFE), Northwestern Polytechnical University (NPU), Xi'an 710072, China. Email: [iamhzhang@nwpu.edu.cn](mailto:iamhzhang@nwpu.edu.cn)

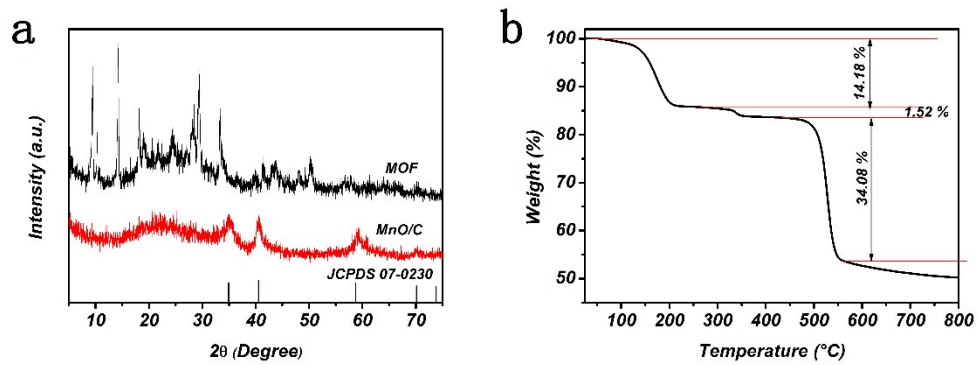

**Figure S1.** (a) XRD patterns of Mn-MOF and MnO@C; (b) TGA curve of Mn-MOF.

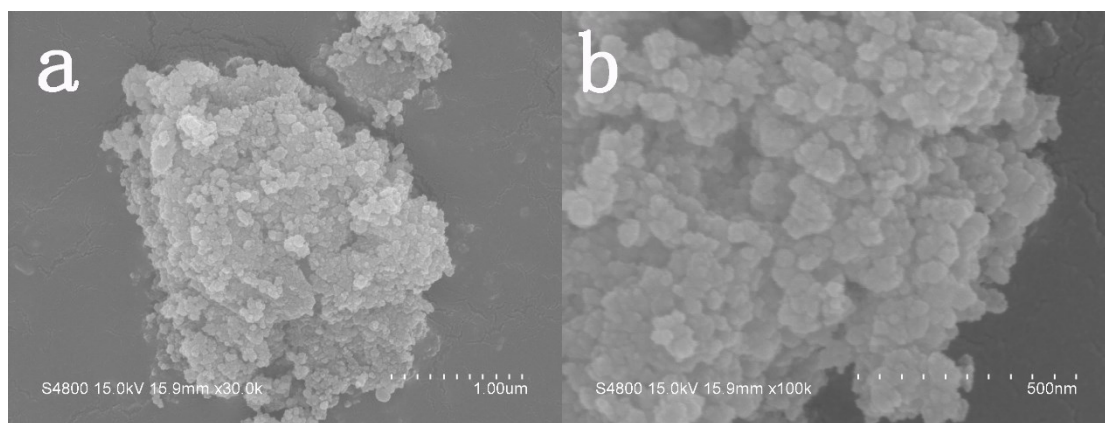

**Figure S2.** SEM images of  $\text{Zn}_2\text{SnO}_4@\text{MnO}/\text{C}$ .

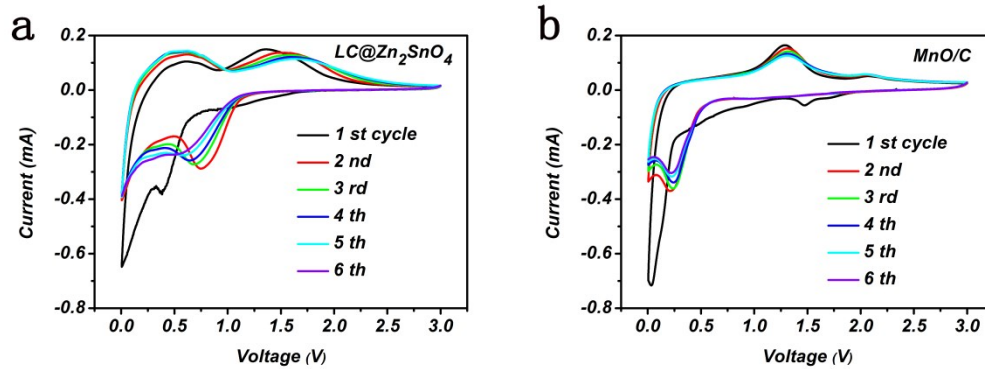

**Figure S3.** Cyclic voltammograms of (a) LC@Zn<sub>2</sub>SnO<sub>4</sub> and (b) MnO/C composite at a scan rate of 0.1 mV s<sup>-1</sup>.

**Table S1.** Performance comparison of our work to the literature.

| Samples                                                           | Current density<br>mA/g | Discharge /charge capacities (mAh/g) | Reference |
|-------------------------------------------------------------------|-------------------------|--------------------------------------|-----------|
| Flower-like Zn <sub>2</sub> SnO <sub>4</sub>                      | 300                     | 501 after 50 cycles                  | 14        |
| Co-doped Zn <sub>2</sub> SnO <sub>4</sub> /GO                     | 100                     | 599 after 100 cycles                 | 16        |
| PPy/Zn <sub>2</sub> SnO <sub>4</sub>                              | 60                      | 478.2 after 50 cycles                | 17        |
| N-doped C /Zn <sub>2</sub> SnO <sub>4</sub>                       | 60                      | 992.4 after 100 cycles               | 19        |
| Zn <sub>2</sub> SnO <sub>4</sub> /rGONRS                          | 100                     | 727.2 after 50 cycles                | 20        |
| 3D Zn <sub>2</sub> SnO <sub>4</sub>                               | 100                     | 739 after 100 cycles                 | 21        |
| Core-shell Zn <sub>2</sub> SnO <sub>4</sub>                       | 100                     | 495 after 100 cycles                 | 33        |
| Zn <sub>2</sub> SnO <sub>4</sub> /CNT                             | 100                     | 703.8 after 30 cycles                | 34        |
| Mn <sub>3</sub> O <sub>4</sub> / Zn <sub>2</sub> SnO <sub>4</sub> | 100                     | 577.4 after 50 cycles                | 37        |
| G/Zn <sub>2</sub> SnO <sub>4</sub>                                | 500                     | 492 after 500 cycles                 | 42        |
| Carbon coated Zn <sub>2</sub> SnO <sub>4</sub>                    | 200                     | 400 after 40 cycles                  | 43        |
| ZIF-8/Zn <sub>2</sub> SnO <sub>4</sub>                            | 500                     | 349.2 after 20 cycles                | 44        |
| Zn <sub>2</sub> SnO <sub>4</sub> @C/Sn                            | 100                     | 1140 after 100 cycles                | 45        |
| Zn <sub>2</sub> SnO <sub>4</sub> /PANi                            | 600                     | 491 after 50 cycles                  | 46        |
| LC@Zn <sub>2</sub> SnO <sub>4</sub> @MnO/C                        | 500                     | 595 after 500 cycles                 | This work |
|                                                                   | 2000                    | 400 after 150 cycles                 |           |

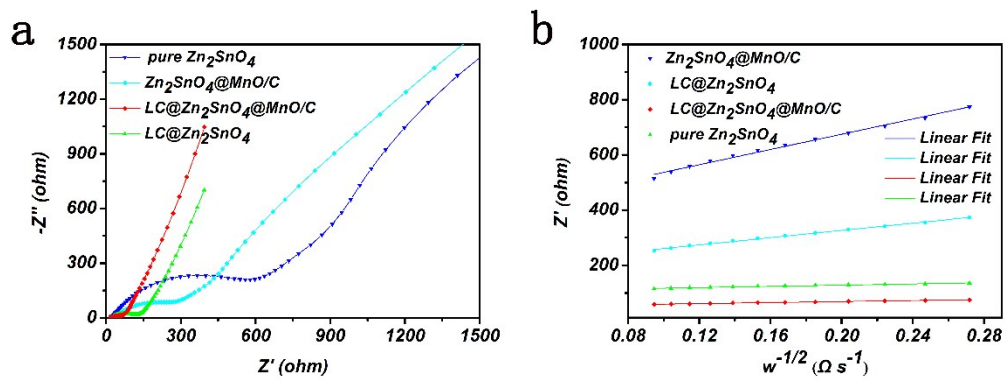

**Figure S4.** (a) Nyquist plots collected on the cells using  $LC@Zn_2SnO_4@MnO/C$ ,  $Zn_2SnO_4@MnO/C$ ,  $LC@Zn_2SnO_4$  composites and pure  $Zn_2SnO_4$  electrodes after 100 cycles; (b) The relationships between  $Z'$  and  $\omega^{-1/2}$  of the as-prepared samples after 100 cycles.

**Table S2.** Impedance parameters of the cells using different electrodes after 100 cycles.

| Samples                                   | $R_e$ ( $\Omega$ ) | $R_{ct}$ ( $\Omega$ ) | $\sigma_w$ ( $\Omega \text{ cm}^2 \text{ s}^{-1/2}$ ) |
|-------------------------------------------|--------------------|-----------------------|-------------------------------------------------------|
| pure $\text{Zn}_2\text{SnO}_4$            | 22.3               | 764.7                 | 1380.24                                               |
| $\text{LC@Zn}_2\text{SnO}_4$              | 20.74              | 137.1                 | 110.02                                                |
| $\text{Zn}_2\text{SnO}_4@\text{MnO/C}$    | 30.69              | 369.2                 | 656.30                                                |
| $\text{LC@Zn}_2\text{SnO}_4@\text{MnO/C}$ | 13.29              | 25.66                 | 92.77                                                 |
